# Supplementary material
Source: PubMed Central journal article supplement (PMC9435974)

## Supplemental Material

**Supplemental Table 1.** Baseline characteristics of study participants by serum potassium at registration.

**Supplementary Table 2:** Sensitivity analyses: The association between short-term changes in serum potassium after initiating ACE inhibitor-based therapy and subsequent risk of major clinical outcomes, using a cut-off value of hyperkalemia of 5.5 mEq/l instead of 5.0 mEq/l.

**Supplementary Table 3:** Competing risk analysis: The association between short-term changes in serum potassium after initiating ACE inhibitor-based therapy and subsequent risk of major clinical outcomes, accounting for the competing risk of death.

**Supplementary Table 4:** Sensitivity analyses: Modification of randomized treatment effects of ACE inhibitor-based therapy on the risk of major clinical outcomes by short-term changes in serum potassium after treatment initiation, using a cut-off value of hyperkalemia of 5.5 mEq/l instead of 5.0 mEq/l.

**Supplementary Table 5:** Competing risk analysis: Modification of randomized treatment effects of ACE inhibitor-based therapy on the risk of major clinical outcomes by short-term changes in serum potassium after treatment initiation, accounting for the competing risk of death.

**Supplemental Table 6.** Rate reductions for major clinical outcomes according to short-term changes in serum potassium after initiating ACE inhibitor-based therapy.

**Supplemental Figure 1.** Mean serum potassium according to short-term changes in serum potassium after initiating ACE inhibitor-based therapy.

**Supplemental Figure 2.** Sensitivity analyses: The association between short-term changes in serum potassium after initiating ACE inhibitor-based therapy and subsequent risk of major clinical outcomes, according to thirds of serum potassium after treatment initiation.

**Supplemental Figure 3.** Subgroup analyses: Modification of randomized treatment effects of ACE inhibitor-based therapy on the risk of composite of major macrovascular and microvascular events according to short-term changes in serum potassium after treatment initiation, stratified by eGFR level at registration and RASI use at registration.

**Supplemental Figure 4.** Sensitivity analyses: Modification of randomized treatment effects of ACE inhibitor-based therapy on the risk of major clinical outcomes, by thirds of serum potassium after treatment initiation.

**Supplemental Table 1:**

Baseline characteristics of the ADVANCE trial participants according to serum potassium at registration.

| Variable                                                  | Serum potassium at registration |                                        |                                     |
|-----------------------------------------------------------|---------------------------------|----------------------------------------|-------------------------------------|
|                                                           | Hypokalemia<br>( $<3.5$ mEq/l)  | Normokalemia<br>( $3.5$ - $5.0$ mEq/l) | Hyperkalemia<br>( $\geq 5.0$ mEq/l) |
| Number of participants                                    | 178                             | 9694                                   | 1162                                |
| <b>Demographic factors</b>                                |                                 |                                        |                                     |
| Age (years)                                               | 66 (6)                          | 66 (6)                                 | 67 (6)                              |
| Female (%)                                                | 71 (40)                         | 4149 (43)                              | 471 (41)                            |
| Residence in Asia (%)                                     | 76 (43)                         | 3624 (37)                              | 433 (37)                            |
| <b>Medical and Lifestyle history</b>                      |                                 |                                        |                                     |
| Duration of diabetes mellitus (years)                     | 6.4 (5.8)                       | 7.8 (6.3)                              | 9.2 (6.8)                           |
| History of macrovascular disease at baseline (%)          | 60 (34)                         | 3078 (32)                              | 413 (36)                            |
| Current smoking (%)                                       | 22 (12)                         | 1493 (15)                              | 150 (13)                            |
| Current alcohol drinking (%)                              | 59 (33)                         | 2978 (31)                              | 313 (27)                            |
| <b>Risk factors</b>                                       |                                 |                                        |                                     |
| Systolic BP (mmHg)                                        | 148 (23)                        | 145 (21)                               | 145 (22)                            |
| Diastolic BP (mmHg)                                       | 82 (12)                         | 81 (11)                                | 80 (11)                             |
| HbA <sub>1c</sub> (%)                                     | 7.3 (1.3)                       | 7.5 (1.5)                              | 7.7 (1.7)                           |
| Total cholesterol (mg/dl)                                 | 195 (45)                        | 201 (46)                               | 202 (48)                            |
| Triglycerides (mg/dl)                                     | 142 (106-212)                   | 143 (106-204)                          | 142 (102-204)                       |
| Body mass index (kg/m <sup>2</sup> )                      | 28.6 (5.4)                      | 28.4 (5.2)                             | 27.8 (5.2)                          |
| eGFR (ml/min/1.73m <sup>2</sup> )                         | 73 (18)                         | 75 (17)                                | 70 (19)                             |
| Decreased eGFR<br>( $<60$ ml/min/1.73m <sup>2</sup> ) (%) | 45 (25)                         | 1951 (20)                              | 383 (33)                            |
| UACR ( $\mu$ g/mg)                                        | 18 (9-44)                       | 15 (7-39)                              | 17 (8-48)                           |
| <b>Randomized treatments</b>                              |                                 |                                        |                                     |
| Perindopril-indapamide (%)                                | 96 (54)                         | 4848 (50)                              | 567 (49)                            |
| Intensive blood glucose control (%)                       | 77 (43)                         | 4858 (50)                              | 583 (50)                            |
| <b>Blood glucose-lowering treatments</b>                  |                                 |                                        |                                     |
| Oral hypoglycemic agents <sup>^</sup> (%)                 | 159 (89)                        | 8791 (91)                              | 1083 (93)                           |
| Insulin (%)                                               | 3 (2)                           | 143 (1)                                | 12 (1)                              |
| <b>BP-lowering treatments</b>                             |                                 |                                        |                                     |
| $\beta$ -blocker (%)                                      | 47 (26)                         | 2339 (24)                              | 314 (27)                            |

|                                                          |                  |                  |                  |
|----------------------------------------------------------|------------------|------------------|------------------|
| Calcium-channel blocker (%)                              | 95 (53)          | 2978 (31)        | 325 (28)         |
| Diuretics† (%)                                           | 93 (52)          | 2253 (23)        | 256 (22)         |
| Angiotensin-converting enzyme inhibitors† (%)            | 87 (49)          | 4088 (42)        | 556 (48)         |
| Angiotensin II receptor blockers (%)                     | 12 (7)           | 528 (5)          | 63 (5)           |
| Renin angiotensin system inhibitors (%)                  | 98 (55)          | 4541 (47)        | 608 (52)         |
| Other antihypertensive agents (%)                        | 29 (16)          | 1193 (12)        | 148 (13)         |
| Any BP-lowering agents† (%)                              | 161 (90)         | 7728 (75)        | 895 (77)         |
| <b>Changes in serum potassium</b>                        |                  |                  |                  |
| Potassium at registration (mEq/l)                        | 3.30 (3.20-3.40) | 4.30 (4.07-4.57) | 5.16 (5.00-5.30) |
| Potassium after 3 weeks during the run-in period (mEq/l) | 3.70 (3.50-3.95) | 4.30 (4.00-4.52) | 4.80 (4.40-5.10) |

For continuous variables, mean values and their corresponding standard deviations (SDs) are presented except that median values (interquartile interval) are presented for triglycerides, UACR, and potassium. Linear trends of triglycerides and UACR across categories were tested after log-transformation.

Categorical variables are presented as number (%).

^Randomized treatment with gliclazide was not included

†Randomized treatment with perindopril-indapamide was not included.

Renin angiotensin system inhibitors were defined as either angiotensin-converting enzyme inhibitors or angiotensin II receptor blockers.

Abbreviations: BP, blood pressure; eGFR, estimated glomerular filtration rate, UACR, urine albumin-creatinine-ratio.

**Supplementary Table 2:**

Sensitivity analyses: The association between short-term changes in serum potassium after initiating ACE inhibitor-based therapy and subsequent risk of major clinical outcomes, using a cut-off value of hyperkalemia of 5.5 mEq/l instead of 5.0 mEq/l.

| Short-term changes in serum potassium                               | N events / N subjects | HR (95% CI)       | P for trend |
|---------------------------------------------------------------------|-----------------------|-------------------|-------------|
| <b><u>Combined major macrovascular and microvascular events</u></b> |                       |                   |             |
| Hypokalemia                                                         | 17/96                 | 1.15 (0.71, 1.86) | 0.78        |
| Normokalemia                                                        | 1393/9039             | 1.00 (reference)  |             |
| Hyperkalemia                                                        | 10/55                 | 1.09 (0.58, 2.04) |             |
| <b><u>All-cause death</u></b>                                       |                       |                   |             |
| Hypokalemia                                                         | 4/96                  | 0.64 (0.24, 1.70) | 0.73        |
| Normokalemia                                                        | 662/9039              | 1.00 (reference)  |             |
| Hyperkalemia                                                        | 3/55                  | 0.72 (0.23, 2.24) |             |
| <b><u>Cardiovascular death</u></b>                                  |                       |                   |             |
| Hypokalemia                                                         | 2/96                  | 0.62 (0.15, 2.50) | 0.63        |
| Normokalemia                                                        | 344/9039              | 1.00 (reference)  |             |
| Hyperkalemia                                                        | 2/55                  | 0.94 (0.23, 3.80) |             |
| <b><u>Major macrovascular events</u></b>                            |                       |                   |             |
| Hypokalemia                                                         | 6/96                  | 0.77 (0.34, 1.72) | 0.53        |
| Normokalemia                                                        | 762/9039              | 1.00 (reference)  |             |
| Hyperkalemia                                                        | 5/55                  | 1.09 (0.45, 2.64) |             |
| <b><u>Major coronary events</u></b>                                 |                       |                   |             |
| Hypokalemia                                                         | 2/96                  | 0.51 (0.13, 2.03) | 0.61        |
| Normokalemia                                                        | 420/9039              | 1.00 (reference)  |             |
| Hyperkalemia                                                        | 2/55                  | 0.76 (0.19, 3.04) |             |
| <b><u>Major cerebrovascular events</u></b>                          |                       |                   |             |
| Hypokalemia                                                         | 3/96                  | 0.78 (0.25, 2.44) | 0.42        |
| Normokalemia                                                        | 338/9039              | 1.00 (reference)  |             |
| Hyperkalemia                                                        | 3/55                  | 1.56 (0.50, 4.88) |             |
| <b><u>Major microvascular events</u></b>                            |                       |                   |             |
| Hypokalemia                                                         | 13/96                 | 1.56 (0.90, 2.70) | 0.19        |
| Normokalemia                                                        | 713/9039              | 1.00 (reference)  |             |
| Hyperkalemia                                                        | 5/55                  | 0.95 (0.39, 2.31) |             |
| <b><u>New or worsening nephropathy</u></b>                          |                       |                   |             |
| Hypokalemia                                                         | 7/96                  | 1.82 (0.85, 3.87) | 0.16        |
| Normokalemia                                                        | 295/9039              | 1.00 (reference)  |             |
| Hyperkalemia                                                        | 2/55                  | 0.84 (0.21, 3.44) |             |
| <b><u>New or worsening retinopathy</u></b>                          |                       |                   |             |
| Hypokalemia                                                         | 7/96                  | 1.38 (0.65, 2.92) | 0.45        |
| Normokalemia                                                        | 454/9039              | 1.00 (reference)  |             |
| Hyperkalemia                                                        | 3/55                  | 0.93 (0.30, 2.89) |             |

Short-term changes in serum potassium was defined based on the measurement made 3 weeks after initiating ACE inhibitor-based therapy.

Models were adjusted for age, sex, region of residence, duration of diabetes mellitus, history of macrovascular diseases, smoking habit, alcohol drinking habit, body mass index, hemoglobin A<sub>1c</sub>, total

cholesterol, log-transformed triglyceride, systolic blood pressure, estimated glomerular filtration rate, log-transformed urine albumin-to-creatinine ratio, randomized blood pressure-lowering intervention, and randomized glucose control intervention (n=9,190).

Abbreviations: CI, confidence interval; HR, hazard ratio.

**Supplementary Table 3:**

Competing risk analysis: The association between short-term changes in serum potassium after initiating ACE inhibitor-based therapy and subsequent risk of major clinical outcomes, accounting for the competing risk of death.

| Short-term changes in serum potassium                               | N     |          |                 | Sub distribution HRs (95% CI) | P for trend |
|---------------------------------------------------------------------|-------|----------|-----------------|-------------------------------|-------------|
|                                                                     | Event | Censored | Competing event |                               |             |
| <b><u>Combined major macrovascular and microvascular events</u></b> |       |          |                 |                               |             |
| Hypokalemia                                                         | 17    | 77       | 2               | 1.17 (0.74, 1.87)             | 0.32        |
| Normokalemia                                                        | 1296  | 7020     | 261             | 1.00 (reference)              |             |
| Hyperkalemia                                                        | 107   | 397      | 13              | 1.15 (0.94, 1.41)             |             |
| <b><u>Cardiovascular death</u></b>                                  |       |          |                 |                               |             |
| Hypokalemia                                                         | 2     | 92       | 2               | 0.64 (0.17, 2.39)             | 0.74        |
| Normokalemia                                                        | 321   | 7954     | 302             | 1.00 (reference)              |             |
| Hyperkalemia                                                        | 25    | 475      | 17              | 1.02 (0.68, 1.52)             |             |
| <b><u>Major macrovascular events</u></b>                            |       |          |                 |                               |             |
| Hypokalemia                                                         | 6     | 88       | 2               | 0.78 (0.36, 1.73)             | 0.29        |
| Normokalemia                                                        | 711   | 7581     | 285             | 1.00 (reference)              |             |
| Hyperkalemia                                                        | 56    | 445      | 16              | 1.13 (0.86, 1.49)             |             |
| <b><u>Major coronary events</u></b>                                 |       |          |                 |                               |             |
| Hypokalemia                                                         | 2     | 91       | 3               | 0.50 (0.13, 1.97)             | 0.86        |
| Normokalemia                                                        | 395   | 7795     | 387             | 1.00 (reference)              |             |
| Hyperkalemia                                                        | 27    | 469      | 21              | 0.96 (0.65, 1.41)             |             |
| <b><u>Major cerebrovascular events</u></b>                          |       |          |                 |                               |             |
| Hypokalemia                                                         | 3     | 89       | 4               | 0.80 (0.26, 2.44)             | 0.058       |
| Normokalemia                                                        | 311   | 7730     | 536             | 1.00 (reference)              |             |
| Hyperkalemia                                                        | 30    | 451      | 36              | 1.45 (0.99, 2.12)             |             |
| <b><u>Major microvascular events</u></b>                            |       |          |                 |                               |             |
| Hypokalemia                                                         | 13    | 80       | 3               | 1.62 (0.94, 2.78)             | 0.76        |
| Normokalemia                                                        | 659   | 7352     | 566             | 1.00 (reference)              |             |
| Hyperkalemia                                                        | 59    | 424      | 34              | 1.16 (0.89, 1.53)             |             |
| <b><u>New or worsening nephropathy</u></b>                          |       |          |                 |                               |             |
| Hypokalemia                                                         | 7     | 86       | 3               | 1.98 (0.89, 4.44)             | 0.37        |
| Normokalemia                                                        | 263   | 7728     | 586             | 1.00 (reference)              |             |
| Hyperkalemia                                                        | 34    | 447      | 36              | 1.42 (0.97, 2.09)             |             |
| <b><u>New or worsening retinopathy</u></b>                          |       |          |                 |                               |             |
| Hypokalemia                                                         | 7     | 85       | 4               | 1.41 (0.69, 2.90)             | 0.75        |
| Normokalemia                                                        | 426   | 7552     | 599             | 1.00 (reference)              |             |
| Hyperkalemia                                                        | 31    | 447      | 39              | 1.01 (0.70, 1.45)             |             |

Short-term changes in serum potassium was defined based on the measurement made 3 weeks after initiating ACE inhibitor-based therapy.

Models were adjusted for age, sex, region of residence, duration of diabetes mellitus, history of macrovascular diseases, smoking habit, alcohol drinking habit, body mass index, hemoglobin A<sub>1c</sub>, total cholesterol, log-transformed triglyceride, systolic blood pressure, estimated glomerular filtration rate, log-

transformed urine albumin-to-creatinine ratio, randomized blood pressure–lowering intervention, and randomized glucose control intervention (n=9,190).  
Abbreviations: CI, confidence interval; HR, hazard ratio.



**Supplementary Table 4:**

Sensitivity analyses: Modification of randomized treatment effects of ACE inhibitor-based therapy on the risk of major clinical outcomes by short-term changes in serum potassium after treatment initiation, using a cut-off value of hyperkalemia of 5.5 mEq/l instead of 5.0 mEq/l.

| Short-term changes in serum potassium                               | N events (%) |          | HR (95% CI)        | P for heterogeneity |
|---------------------------------------------------------------------|--------------|----------|--------------------|---------------------|
|                                                                     | Active       | Placebo  |                    |                     |
| <b><u>Combined major macrovascular and microvascular events</u></b> |              |          |                    |                     |
| Hypokalemia                                                         | 9 (20)       | 8 (15)   | 1.38 (0.53, 3.59)  | 0.69                |
| Normokalemia                                                        | 712 (15)     | 766 (16) | 0.92 (0.83, 1.02)  |                     |
| Hyperkalemia                                                        | 7 (18)       | 3 (16)   | 1.10 (0.28, 4.26)  |                     |
| <b><u>All-cause death</u></b>                                       |              |          |                    |                     |
| Hypokalemia                                                         | 1 (2)        | 3 (6)    | 0.40 (0.04, 3.82)  | 0.48                |
| Normokalemia                                                        | 334 (7)      | 386 (8)  | 0.86 (0.74, 1.00)  |                     |
| Hyperkalemia                                                        | 1 (3)        | 2 (11)   | 0.24 (0.02, 2.68)  |                     |
| <b><u>Cardiovascular death</u></b>                                  |              |          |                    |                     |
| Hypokalemia                                                         | 1 (2)        | 1 (2)    | 1.19 (0.07, 19.01) | 0.91                |
| Normokalemia                                                        | 160 (3)      | 212 (4)  | 0.75 (0.61, 0.92)  |                     |
| Hyperkalemia                                                        | 1 (3)        | 1 (5)    | 0.49 (0.03, 7.89)  |                     |
| <b><u>Major macrovascular events</u></b>                            |              |          |                    |                     |
| Hypokalemia                                                         | 3 (7)        | 3 (6)    | 1.21 (0.24, 6.00)  | 0.73                |
| Normokalemia                                                        | 386 (8)      | 430 (9)  | 0.89 (0.78, 1.02)  |                     |
| Hyperkalemia                                                        | 4 (10)       | 1 (5)    | 1.97 (0.22, 17.60) |                     |
| <b><u>Major coronary events</u></b>                                 |              |          |                    |                     |
| Hypokalemia                                                         | 2 (4)        | 0 (0)    | NA                 | 0.68                |
| Normokalemia                                                        | 212 (4)      | 237 (5)  | 0.89 (0.74, 1.07)  |                     |
| Hyperkalemia                                                        | 1 (3)        | 1 (5)    | 0.49 (0.03, 7.89)  |                     |
| <b><u>Major cerebrovascular events</u></b>                          |              |          |                    |                     |
| Hypokalemia                                                         | 1 (2)        | 2 (4)    | 0.58 (0.05, 6.41)  | 0.70                |
| Normokalemia                                                        | 174 (4)      | 186 (4)  | 0.93 (0.76, 1.14)  |                     |
| Hyperkalemia                                                        | 3 (8)        | 0 (0)    | NA                 |                     |
| <b><u>Major microvascular events</u></b>                            |              |          |                    |                     |
| Hypokalemia                                                         | 7 (16)       | 6 (11)   | 1.36 (0.46, 4.06)  | 0.75                |
| Normokalemia                                                        | 368 (8)      | 382 (8)  | 0.96 (0.83, 1.10)  |                     |
| Hyperkalemia                                                        | 3 (8)        | 2 (11)   | 0.65 (0.11, 3.88)  |                     |
| <b><u>New or worsening nephropathy</u></b>                          |              |          |                    |                     |
| Hypokalemia                                                         | 5 (11)       | 2 (4)    | 2.99 (0.58, 15.43) | 0.31                |
| Normokalemia                                                        | 148 (3)      | 165 (3)  | 0.89 (0.71, 1.11)  |                     |
| Hyperkalemia                                                        | 1 (3)        | 1 (5)    | 0.43 (0.03, 6.94)  |                     |
| <b><u>New or worsening retinopathy</u></b>                          |              |          |                    |                     |
| Hypokalemia                                                         | 2 (4)        | 5 (9)    | 0.45 (0.09, 2.32)  | 0.61                |
| Normokalemia                                                        | 243 (5)      | 236 (5)  | 1.03 (0.86, 1.23)  |                     |
| Hyperkalemia                                                        | 2 (5)        | 1 (5)    | 0.89 (0.08, 9.85)  |                     |

Short-term changes in serum potassium was defined based on the measurement made 3 weeks after initiating ACE inhibitor-based therapy.

Abbreviations: CI, confidence interval; HR, hazard ratio; NA, not available.

Active: perindopril-indapamide.

In the active group 45 participants were in the Hypokalemia group, 4764 Normokalemia, and 39 Hyperkalemia, corresponding numbers for the placebo group were 54, 4773 and 19.

**Supplementary Table 5:**

Competing risk analysis: Modification of randomized treatment effects of ACE inhibitor-based therapy on the risk of major clinical outcomes by short-term changes in serum potassium after treatment initiation, accounting for the competing risk of death.

| Short-term changes in serum potassium                               | N      |          |                 |         |          |                 | Sub distribution HRs (95%CI) | P for heterogeneity |
|---------------------------------------------------------------------|--------|----------|-----------------|---------|----------|-----------------|------------------------------|---------------------|
|                                                                     | Active |          |                 | Placebo |          |                 |                              |                     |
|                                                                     | Event  | Censored | Competing event | Event   | Censored | Competing event |                              |                     |
| <b><u>Combined major macrovascular and microvascular events</u></b> |        |          |                 |         |          |                 |                              |                     |
| Hypokalemia                                                         | 9      | 36       | 0               | 8       | 44       | 2               | 1.41 (0.55, 3.65)            | 0.64                |
| Normokalemia                                                        | 659    | 3716     | 136             | 715     | 3668     | 145             | 0.92 (0.83, 1.02)            |                     |
| Hyperkalemia                                                        | 60     | 224      | 8               | 54      | 202      | 8               | 0.99 (0.69, 1.43)            |                     |
| <b><u>Cardiovascular death</u></b>                                  |        |          |                 |         |          |                 |                              |                     |
| Hypokalemia                                                         | 1      | 44       | 0               | 1       | 51       | 2               | 1.19 (0.08, 18.48)           | 0.94                |
| Normokalemia                                                        | 149    | 4199     | 163             | 198     | 4165     | 165             | 0.75 (0.61, 0.93)            |                     |
| Hyperkalemia                                                        | 12     | 269      | 11              | 15      | 239      | 10              | 0.72 (0.34, 1.53)            |                     |
| <b><u>Major macrovascular events</u></b>                            |        |          |                 |         |          |                 |                              |                     |
| Hypokalemia                                                         | 3      | 42       | 0               | 3       | 49       | 2               | 1.22 (0.25, 6.01)            | 0.27                |
| Normokalemia                                                        | 355    | 4002     | 154             | 407     | 3967     | 154             | 0.87 (0.75, 1.00)            |                     |
| Hyperkalemia                                                        | 35     | 247      | 10              | 24      | 230      | 10              | 1.34 (0.79, 2.25)            |                     |
| <b><u>Major coronary events</u></b>                                 |        |          |                 |         |          |                 |                              |                     |
| Hypokalemia                                                         | 2      | 43       | 0               | 0       | 51       | 3               | NA                           | 0.67                |
| Normokalemia                                                        | 198    | 4115     | 198             | 225     | 4082     | 221             | 0.88 (0.73, 1.06)            |                     |
| Hyperkalemia                                                        | 15     | 264      | 13              | 13      | 237      | 14              | 1.04 (0.50, 2.20)            |                     |
| <b><u>Major cerebrovascular events</u></b>                          |        |          |                 |         |          |                 |                              |                     |
| Hypokalemia                                                         | 1      | 43       | 1               | 2       | 49       | 3               | 0.59 (0.05, 6.57)            | 0.27                |
| Normokalemia                                                        | 157    | 4079     | 275             | 175     | 4046     | 307             | 0.90 (0.72, 1.11)            |                     |
| Hyperkalemia                                                        | 20     | 252      | 20              | 11      | 232      | 21              | 1.66 (0.80, 3.47)            |                     |
| <b><u>Major microvascular events</u></b>                            |        |          |                 |         |          |                 |                              |                     |

|                                            |     |      |     |     |      |     |                    |      |
|--------------------------------------------|-----|------|-----|-----|------|-----|--------------------|------|
| Hypokalemia                                | 7   | 38   | 0   | 6   | 45   | 3   | 1.43 (0.48, 4.20)  |      |
| Normokalemia                               | 341 | 3891 | 279 | 350 | 3845 | 333 | 0.98 (0.84, 1.14)  | 0.54 |
| Hyperkalemia                               | 30  | 244  | 18  | 34  | 210  | 20  | 0.78 (0.47, 1.27)  |      |
| <b><u>New or worsening nephropathy</u></b> |     |      |     |     |      |     |                    |      |
| Hypokalemia                                | 5   | 40   | 0   | 2   | 49   | 3   | 3.11 (0.61, 15.82) |      |
| Normokalemia                               | 131 | 4089 | 291 | 145 | 4041 | 342 | 0.90 (0.71, 1.14)  | 0.29 |
| Hyperkalemia                               | 18  | 254  | 20  | 21  | 223  | 20  | 0.76 (0.40, 1.43)  |      |
| <b><u>New or worsening retinopathy</u></b> |     |      |     |     |      |     |                    |      |
| Hypokalemia                                | 2   | 42   | 1   | 5   | 46   | 3   | 0.46 (0.09, 2.33)  |      |
| Normokalemia                               | 230 | 3985 | 296 | 221 | 3956 | 351 | 1.05 (0.87, 1.26)  | 0.52 |
| Hyperkalemia                               | 15  | 257  | 20  | 16  | 223  | 25  | 0.84 (0.42, 1.70)  |      |

Short-term changes in serum potassium was defined based on the measurement made 3 weeks after initiating ACE inhibitor-based therapy.

Abbreviations: CI, confidence interval; HR, hazard ratio; NA, not available.

Active: perindopril-indapamide.

**Supplemental Table 6:** Rate reductions for major clinical outcomes according to short-term changes in serum potassium after initiating ACE inhibitor-based therapy.

| Short-term changes<br>in serum potassium                            | Incidence rate (per 1000 PYs) |                   |                   | Rate reductions<br>over 5 years per<br>1000 PYs | NNT to<br>prevent<br>one event<br>over 5 |
|---------------------------------------------------------------------|-------------------------------|-------------------|-------------------|-------------------------------------------------|------------------------------------------|
|                                                                     | Overall                       | Active            | Placebo           |                                                 |                                          |
| <b><u>Combined major macrovascular and microvascular events</u></b> |                               |                   |                   |                                                 |                                          |
| Hypokalemia                                                         | 41.8 (21.9, 61.6)             | 49.2 (17.1, 81.3) | 35.7 (11.0, 60.5) | -67.5 (-209.0, 74.2)                            | -15                                      |
| Normokalemia                                                        | 37.5 (35.5, 39.5)             | 35.9 (33.2, 38.6) | 39.1 (36.3, 42.0) | 16.2 (2.1, 30.2)                                | 62                                       |
| Hyperkalemia                                                        | 52.1 (42.6, 61.7)             | 52.0 (38.8, 65.1) | 52.3 (38.3, 66.2) | 1.4 (-66.3, 69.0)                               | 736                                      |
| <b>Overall</b>                                                      | 40.0 (38.2, 41.9)             | 38.1 (35.6, 40.7) | 42.0 (39.3, 44.7) | 19.2 (6.1, 32.3)                                | 52                                       |
| <b><u>All-cause death</u></b>                                       |                               |                   |                   |                                                 |                                          |
| Hypokalemia                                                         | 9.2 (0.2, 18.3)               | 5.1 (0, 15.0)     | 12.8 (0, 27.2)    | 38.5 (-24.5, 101.5)                             | 26                                       |
| Normokalemia                                                        | 17.3 (16.0, 18.7)             | 16.0 (14.2, 17.8) | 18.7 (16.8, 20.6) | 13.4 (4.1, 22.6)                                | 75                                       |
| Hyperkalemia                                                        | 20.2 (14.5, 26.0)             | 18.4 (10.9, 25.9) | 22.3 (13.6, 31.1) | 19.6 (-21.0, 60.2)                              | 51                                       |
| <b>Overall</b>                                                      | 18.4 (17.2, 19.6)             | 17.0 (15.3, 18.6) | 19.8 (18.0, 21.5) | 13.8 (5.2, 22.4)                                | 73                                       |
| <b><u>Cardiovascular death</u></b>                                  |                               |                   |                   |                                                 |                                          |
| Hypokalemia                                                         | 4.6 (0, 11.1)                 | 5.1 (0, 15.0)     | 4.3 (0, 12.7)     | -3.9 (-49.5, 41.7)                              | -257                                     |
| Normokalemia                                                        | 8.9 (8.0, 9.9)                | 7.7 (6.4, 8.9)    | 10.2 (8.8, 11.6)  | 12.8 (6.1, 19.4)                                | 78                                       |
| Hyperkalemia                                                        | 11.4 (7.1, 15.7)              | 9.6 (4.2, 15.0)   | 13.4 (6.6, 20.2)  | 19.2 (-11.4, 49.7)                              | 52                                       |
| <b>Overall</b>                                                      | 9.8 (8.9, 10.7)               | 8.8 (7.6, 10.0)   | 10.8 (9.5, 12.1)  | 10.0 (3.7, 16.2)                                | 100                                      |
| <b><u>Major macrovascular events</u></b>                            |                               |                   |                   |                                                 |                                          |
| Hypokalemia                                                         | 14.2 (2.8, 25.6)              | 15.9 (0, 33.8)    | 12.9 (0, 27.5)    | -14.7 (-95.8, 66.3)                             | -68                                      |
| Normokalemia                                                        | 20.1 (18.7, 21.6)             | 18.7 (16.8, 20.7) | 21.6 (19.5, 23.7) | 14.3 (4.2, 24.4)                                | 70                                       |
| Hyperkalemia                                                        | 25.8 (19.2, 32.3)             | 29.3 (19.6, 38.9) | 22.0 (13.2, 30.7) | -36.5 (-82.9, 9.9)                              | -27                                      |
| <b>Overall</b>                                                      | 21.5 (20.2, 22.9)             | 20.6 (18.7, 22.4) | 22.5 (20.5, 24.4) | 9.5 (0.1, 18.9)                                 | 105                                      |
| <b><u>Major coronary events</u></b>                                 |                               |                   |                   |                                                 |                                          |
| Hypokalemia                                                         | 4.7 (0, 11.2)                 | 10.4 (0, 24.7)    | NA                | NA                                              | NA                                       |
| Normokalemia                                                        | 11.0 (10.0, 12.1)             | 10.3 (8.9, 11.7)  | 11.7 (10.2, 13.3) | 7.3 (-0.2, 14.7)                                | 138                                      |
| Hyperkalemia                                                        | 11.9 (7.5, 16.3)              | 12.1 (6.0, 18.3)  | 11.7 (5.3, 18.0)  | -2.2 (-33.4, 29.0)                              | -458                                     |
| <b>Overall</b>                                                      | 11.8 (10.9, 12.8)             | 11.2 (9.8, 12.5)  | 12.5 (11.1, 13.9) | 6.6 (-0.3, 13.6)                                | 151                                      |
| <b><u>Major cerebrovascular events</u></b>                          |                               |                   |                   |                                                 |                                          |
| Hypokalemia                                                         | 7.0 (0, 15.0)                 | 5.2 (0, 15.3)     | 8.6 (0, 20.6)     | 17.2 (-38.5, 73.0)                              | 58                                       |
| Normokalemia                                                        | 8.7 (7.7, 9.6)                | 8.2 (6.9, 9.5)    | 9.2 (7.8, 10.5)   | 4.9 (-1.7, 11.5)                                | 205                                      |
| Hyperkalemia                                                        | 13.4 (8.7, 18.2)              | 16.5 (9.3, 23.8)  | 10.0 (4.1, 15.9)  | -32.6 (-65.8, 0.7)                              | -31                                      |
| <b>Overall</b>                                                      | 9.2 (8.3, 10.1)               | 9.1 (7.9, 10.3)   | 9.3 (8.1, 10.5)   | 0.9 (-5.2, 7.1)                                 | 1063                                     |
| <b><u>Major microvascular events</u></b>                            |                               |                   |                   |                                                 |                                          |
| Hypokalemia                                                         | 31.3 (14.3, 48.3)             | 36.6 (9.5, 63.7)  | 26.7 (5.3, 48.1)  | -49.1 (-169.8, 71.6)                            | -20                                      |
| Normokalemia                                                        | 18.4 (17.0, 19.8)             | 18.1 (16.2, 20.1) | 18.7 (16.7, 20.6) | 2.6 (-7.1, 12.3)                                | 385                                      |
| Hyperkalemia                                                        | 28.3 (21.4, 35.2)             | 24.9 (16.0, 33.7) | 32.2 (21.4, 43.1) | 36.9 (-12.4, 86.2)                              | 27                                       |
| <b>Overall</b>                                                      | 19.9 (18.6, 21.1)             | 18.9 (17.2, 20.7) | 20.8 (18.9, 22.6) | 9.1 (0.0, 18.2)                                 | 110                                      |

**New or worsening nephropathy**

|                |                       |                       |                        |                        |            |
|----------------|-----------------------|-----------------------|------------------------|------------------------|------------|
| Hypokalemia    | 16.6 (4.3, 29.0)      | 26.0 (3.2, 48.8)      | 8.7 (0, 20.9)          | -86.3 (-175.3, 2.6)    | -12        |
| Normokalemia   | 7.2 (6.3, 8.0)        | 6.8 (5.6, 8.0)        | 7.6 (6.3, 8.8)         | 3.8 (-2.2, 9.8)        | 262        |
| Hyperkalemia   | 16.8 (11.5, 22.1)     | 14.6 (7.8, 21.3)      | 19.3 (11.1, 27.6)      | 23.7 (-13.8, 61.2)     | 42         |
| <b>Overall</b> | <b>8.4 (7.6, 9.2)</b> | <b>7.6 (6.5, 8.7)</b> | <b>9.2 (8.0, 10.4)</b> | <b>7.8 (2.0, 13.7)</b> | <b>128</b> |

**New or worsening retinopathy**

|                |                          |                          |                          |                         |              |
|----------------|--------------------------|--------------------------|--------------------------|-------------------------|--------------|
| Hypokalemia    | 16.5 (4.3, 28.7)         | 10.2 (0, 24.2)           | 22.0 (2.7, 41.3)         | 59.3 (-26.4, 144.9)     | 17           |
| Normokalemia   | 11.9 (10.8, 13.0)        | 12.1 (10.6, 13.7)        | 11.7 (10.1, 13.2)        | -2.4 (-10.1, 5.4)       | -421         |
| Hyperkalemia   | 13.5 (8.7, 18.2)         | 12.3 (6.1, 18.5)         | 14.8 (7.5, 22.0)         | 12.5 (-21.1, 46.1)      | 80           |
| <b>Overall</b> | <b>12.3 (11.3, 13.4)</b> | <b>12.4 (11.0, 13.8)</b> | <b>12.3 (10.9, 13.7)</b> | <b>-0.3 (-7.5, 6.8)</b> | <b>-3189</b> |

---

Short-term change in serum potassium was defined based on the measurement made 3 weeks after initiating ACE inhibitor-based therapy.

Abbreviations: NA, not available; NNT, number needed to treat; PYs, person-years.

## Figure legends

### **Supplemental Figure 1. Mean serum potassium according to short-term changes in serum potassium after initiating ACE inhibitor-based therapy.**

Change in serum potassium was defined based on the measurement made 3 weeks after initiating ACE inhibitor-based therapy.

### **Supplemental Figure 2. Sensitivity analyses: The association between short-term changes in serum potassium after initiating ACE inhibitor-based therapy and subsequent risk of major clinical outcomes, according to thirds of serum potassium after treatment initiation.**

Short-term changes in serum potassium were defined based on the measurement made 3 weeks after initiating ACE inhibitor-based therapy, and was subgrouped into 3 groups according to thirds (lowest third:  $\leq 4.10$  mEq/l, middle third: 4.11-4.44 mEq/l, highest third:  $\geq 4.45$  mEq/l).

Models were adjusted for age, sex, region of residence, duration of diabetes mellitus, history of macrovascular diseases, smoking habit, alcohol drinking habit, body mass index, hemoglobin A<sub>1c</sub>, total cholesterol, log-transformed triglyceride, systolic blood pressure, estimated glomerular filtration rate, log-transformed urine albumin-to-creatinine ratio, randomized blood pressure-lowering intervention, and randomized glucose control intervention (n=9,190).

Abbreviations: CI, confidence interval; HR, hazard ratio.

### **Supplemental Figure 3. Subgroup analyses: Modification of randomized treatment effects of ACE inhibitor-based therapy on the risk of composite of major macrovascular and microvascular events according to short-term changes in serum potassium after treatment initiation, stratified by eGFR level at registration and RASI use at registration.**

Short-term changes in serum potassium were defined based on the measurement made 3 weeks after initiating ACE inhibitor-based therapy

White diamonds indicate the HRs for subgroups defined by acute change in serum potassium.

Black diamonds indicate the HRs of each subgroup among overall randomized participants of the ADVANCE trial.

Abbreviations: RASI, renin angiotensin system inhibitors; CI, confidence interval; HR, hazard ratio.

**Supplemental Figure 4. Sensitivity analyses: Modification of randomized treatment effects of ACE inhibitor-based therapy on the risk of major clinical outcomes by thirds of serum potassium after treatment initiation.**

Change in serum potassium was defined based on the measurement made 3 weeks after initiating ACE inhibitor-based therapy, and was subgrouped into 3 groups according to thirds (lowest third:  $\leq 4.10$  mEq/l, middle third: 4.11-4.44 mEq/l, highest third:  $\geq 4.45$  mEq/l).

White diamonds indicate the HRs for subgroups defined by acute change in serum potassium.

Black diamonds indicate the HRs of overall randomized participants of the ADVANCE trial (n=11,140).

Abbreviations: CI, confidence interval; HR, hazard ratio.

Active: perindopril-indapamide.



## Supplemental Figure 1

A)

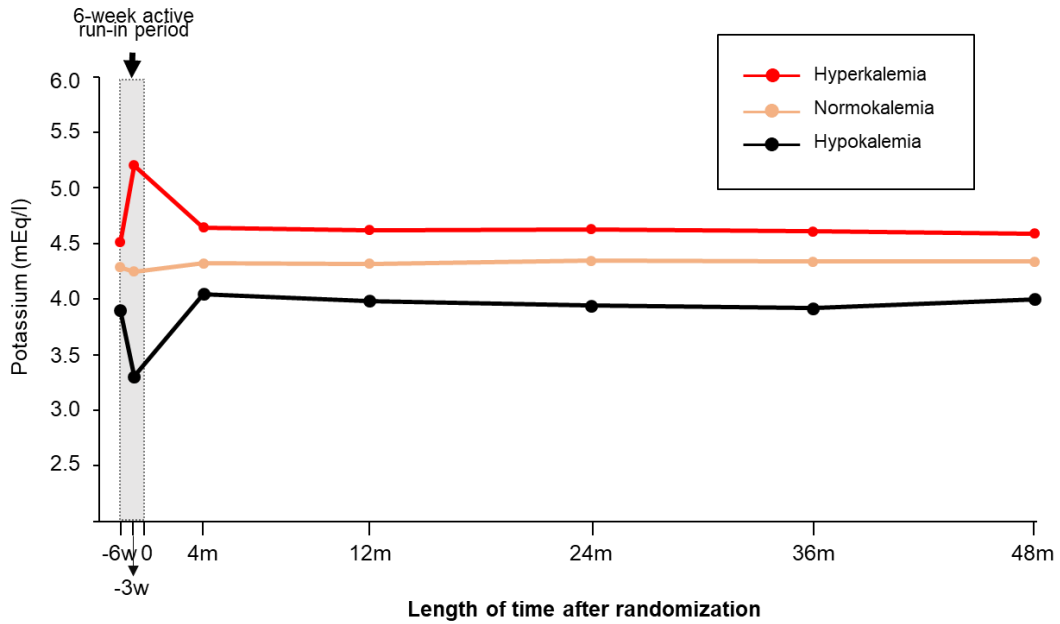

B)

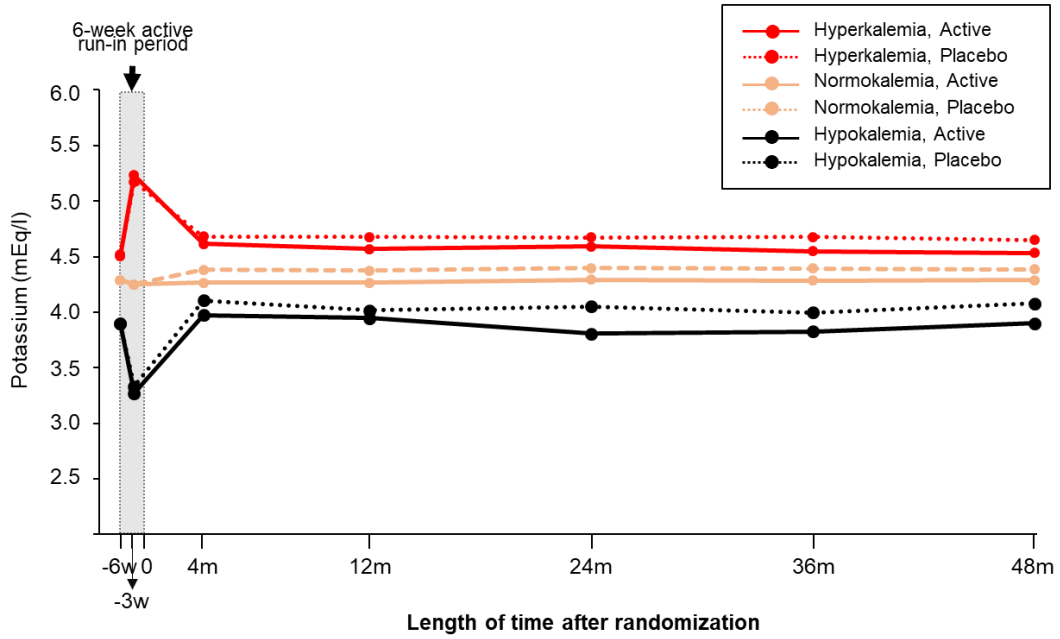

## Supplemental Figure 2

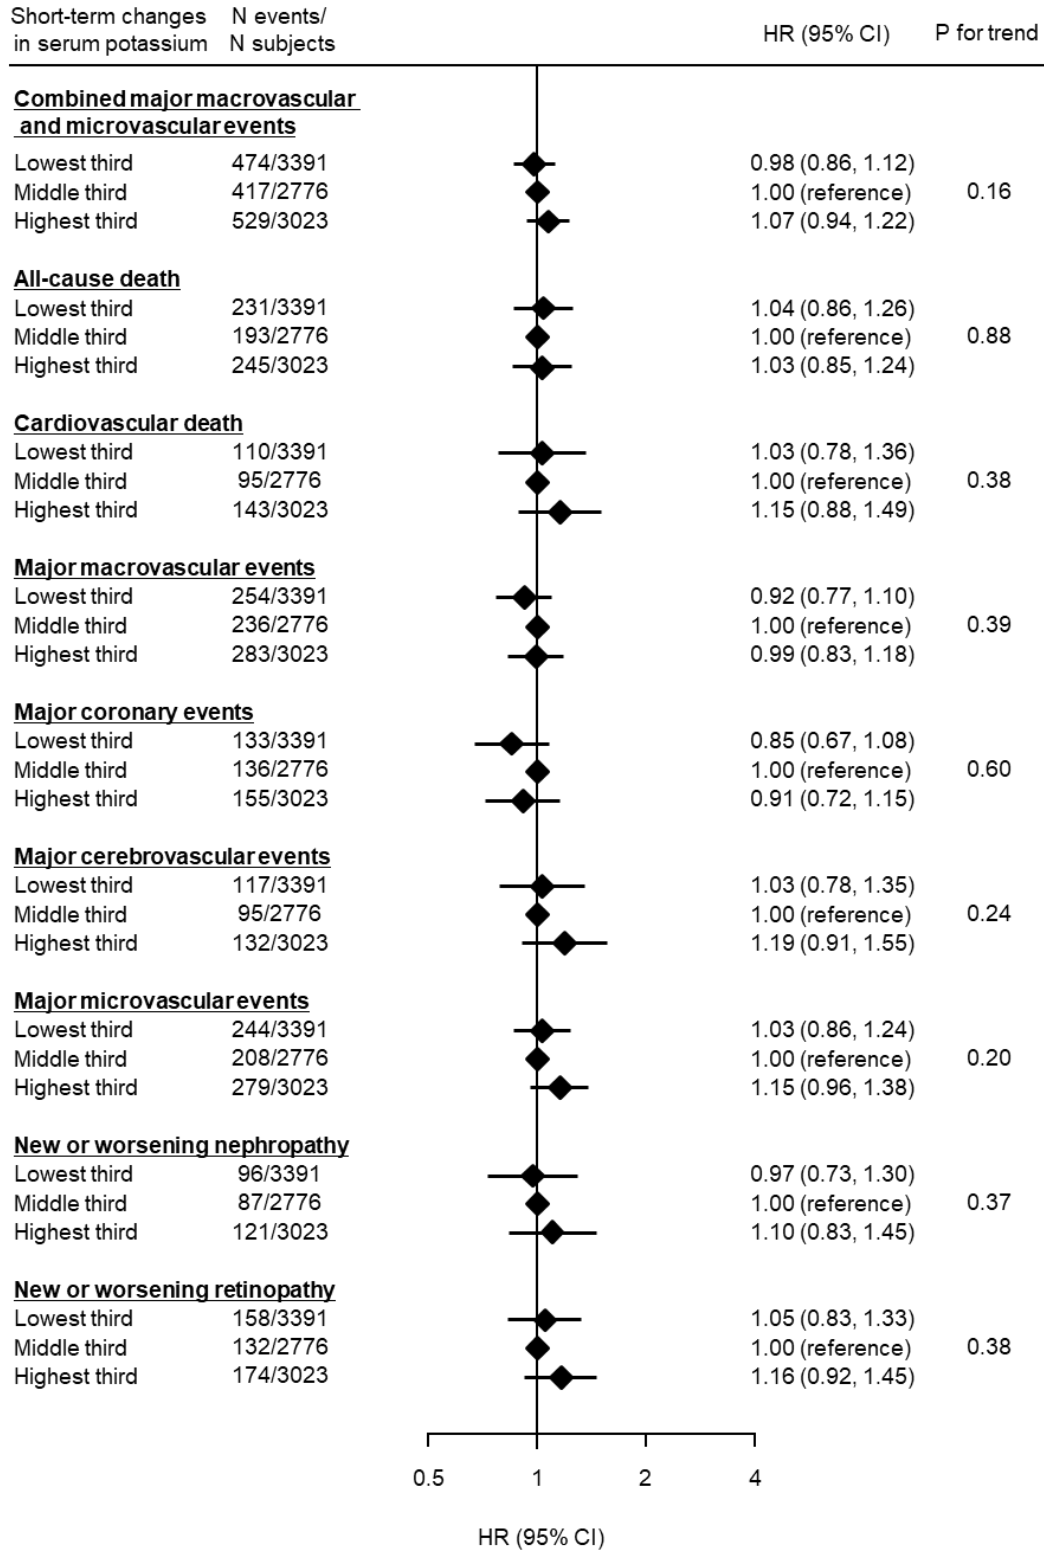

### Supplemental Figure 3

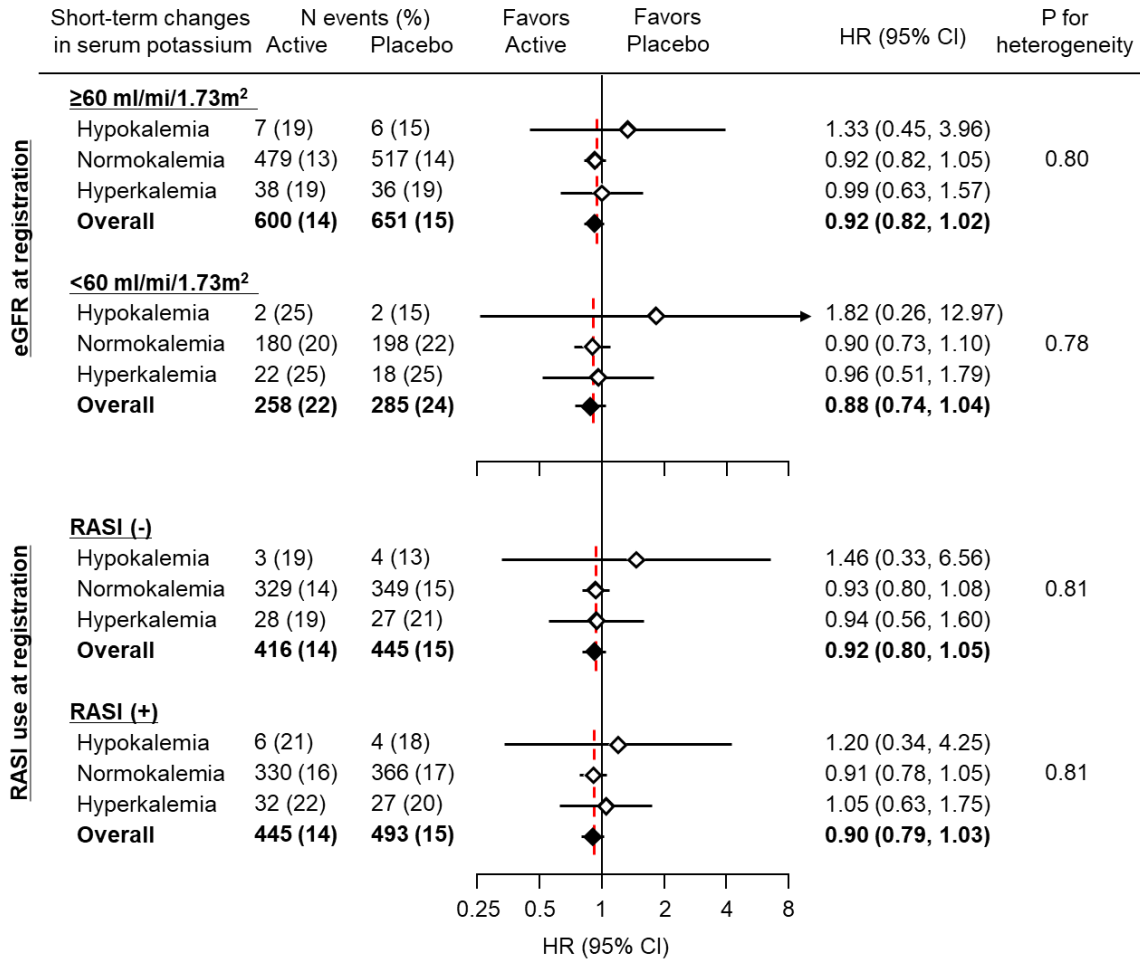

### Supplemental Figure 4

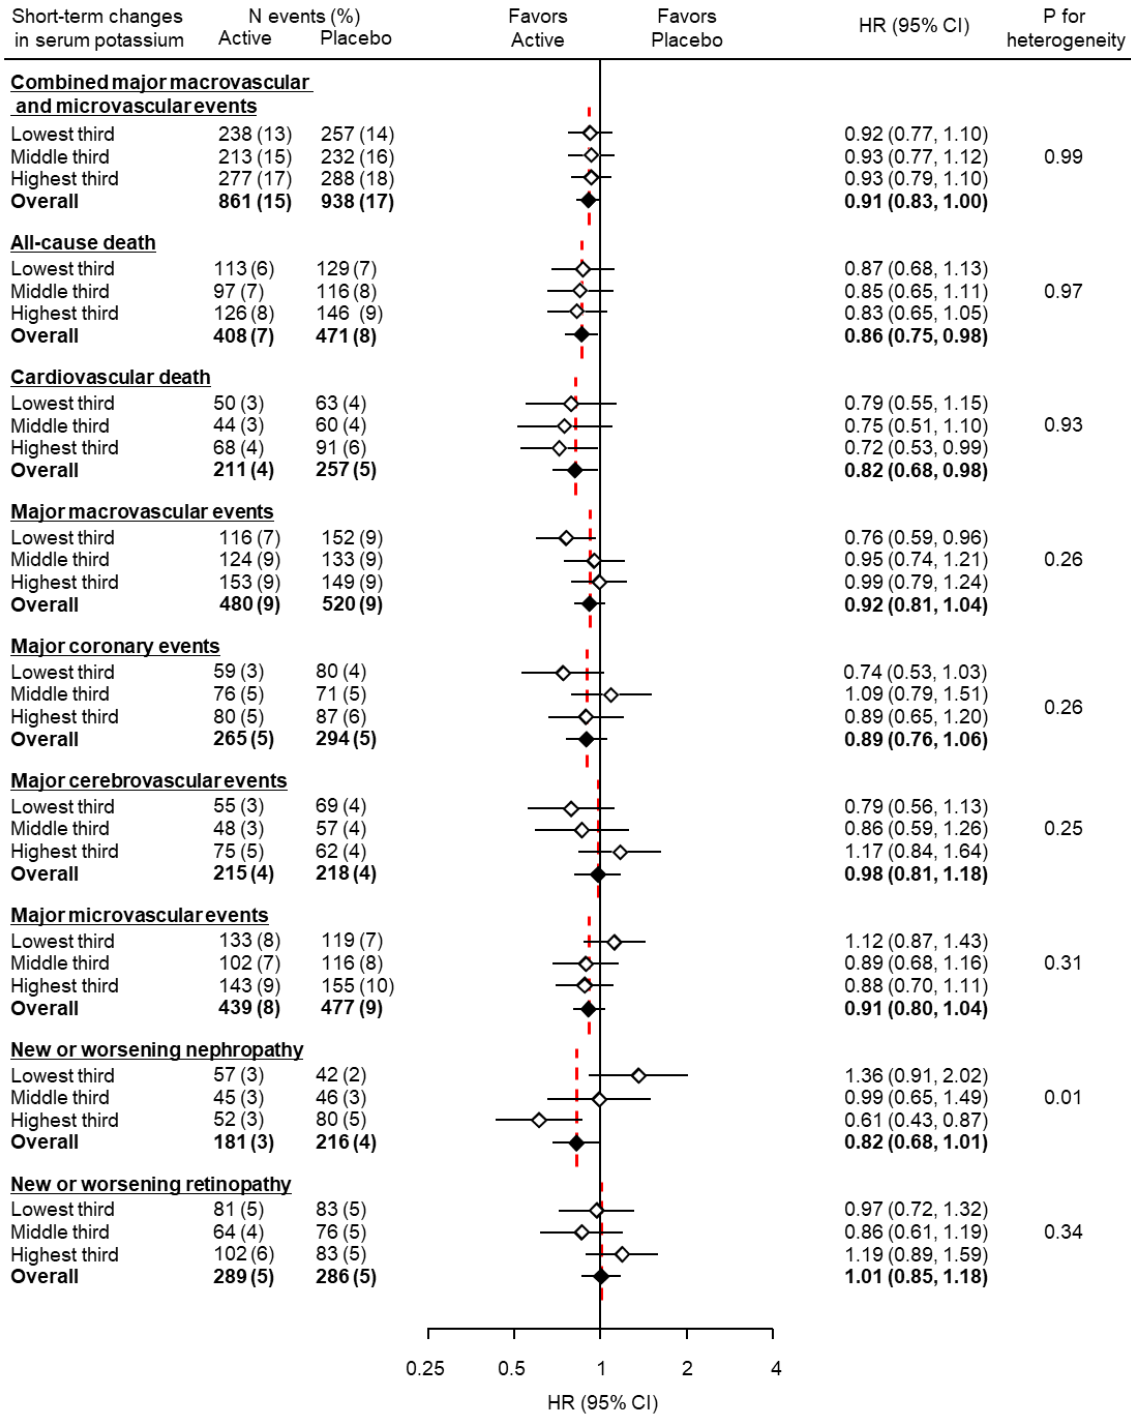

Supplement: CJN.00180122-SupplementaryData1.pdf [file CJN.00180122-SupplementaryData1.pdf]
